# Supplementary material for: Genome scans for divergent selection in natural populations of the widespread hardwood species Eucalyptus grandis (Myrtaceae) using microsatellites
Source: PubMed Central journal article supplement (PMC5066178; doi:10.1038/srep34941), 2016-10-17
Supplement: srep34941-s1.pdf [file srep34941-s1.pdf]

## Supplementary Information

### Genome scans for divergent selection in natural populations of the widespread hardwood species *Eucalyptus grandis* (Myrtaceae) using microsatellites

Zhijiao Song<sup>1,2,5†</sup>, Miaomiao Zhang<sup>2,4,†</sup>, Fagen Li<sup>2</sup>, Qijie Weng<sup>2</sup>, Chanpin Zhou<sup>2</sup>, Mei Li<sup>2</sup>, Jie Li<sup>2</sup>, Huanhua Huang<sup>3</sup>, Xiaoyong Mo<sup>4,\*</sup> & Siming Gan<sup>1,2,\*</sup>

<sup>1</sup>State Key Laboratory of Tree Genetics and Breeding, Chinese Academy of Forestry, Xiangshan Road, Beijing 100091, China. <sup>2</sup>SFA Key Laboratory of Tropical Forestry, Research Institute of Tropical Forestry, Chinese Academy of Forestry, Longdong, Guangzhou 510520, China. <sup>3</sup>Guangdong Academy of Forestry, Longdong, Guangzhou 510520, China. <sup>4</sup>College of Forestry, South China Agricultural University, 284 Block, Wushan Street, Guangzhou 510642, China. <sup>5</sup>Baoshan University, Yuanzheng Road, Baoshan 678000, China. †These authors contributed equally to this work. \*Correspondence and requests for materials should be addressed to X.M. (email: motree@163.com) or S.G. (email: siming.gan@ritf.ac.cn)

**Supplementary Figures S1–S3 and Tables S1–S4**

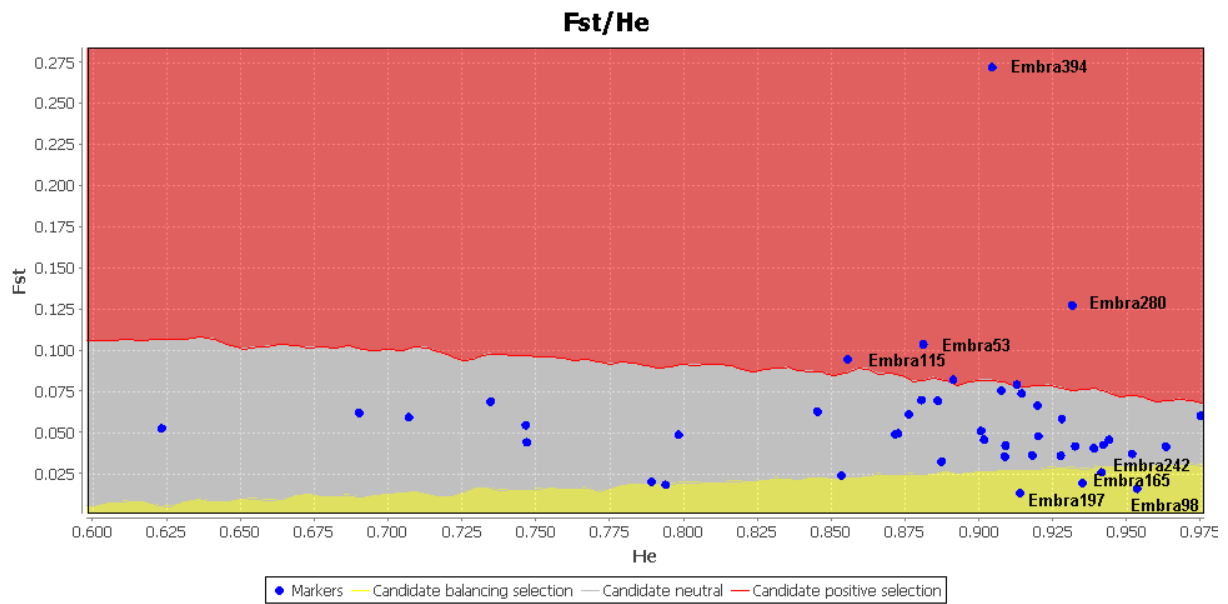

**Supplementary Figure S1. Distribution of  $F_{ST}$  values for 45 gSSR loci at 95 % and 5 % confidence levels as detected with LOSITAN over the 16 *E. grandis* populations.** The eight loci outside the confidence level of 95 % (four loci: Embra115, Embra280, Embra53 and Embra394) or 5 % (four loci: Embra98, Embra242, Embra197 and Embra165) were excluded from population diversity and structure analyses.

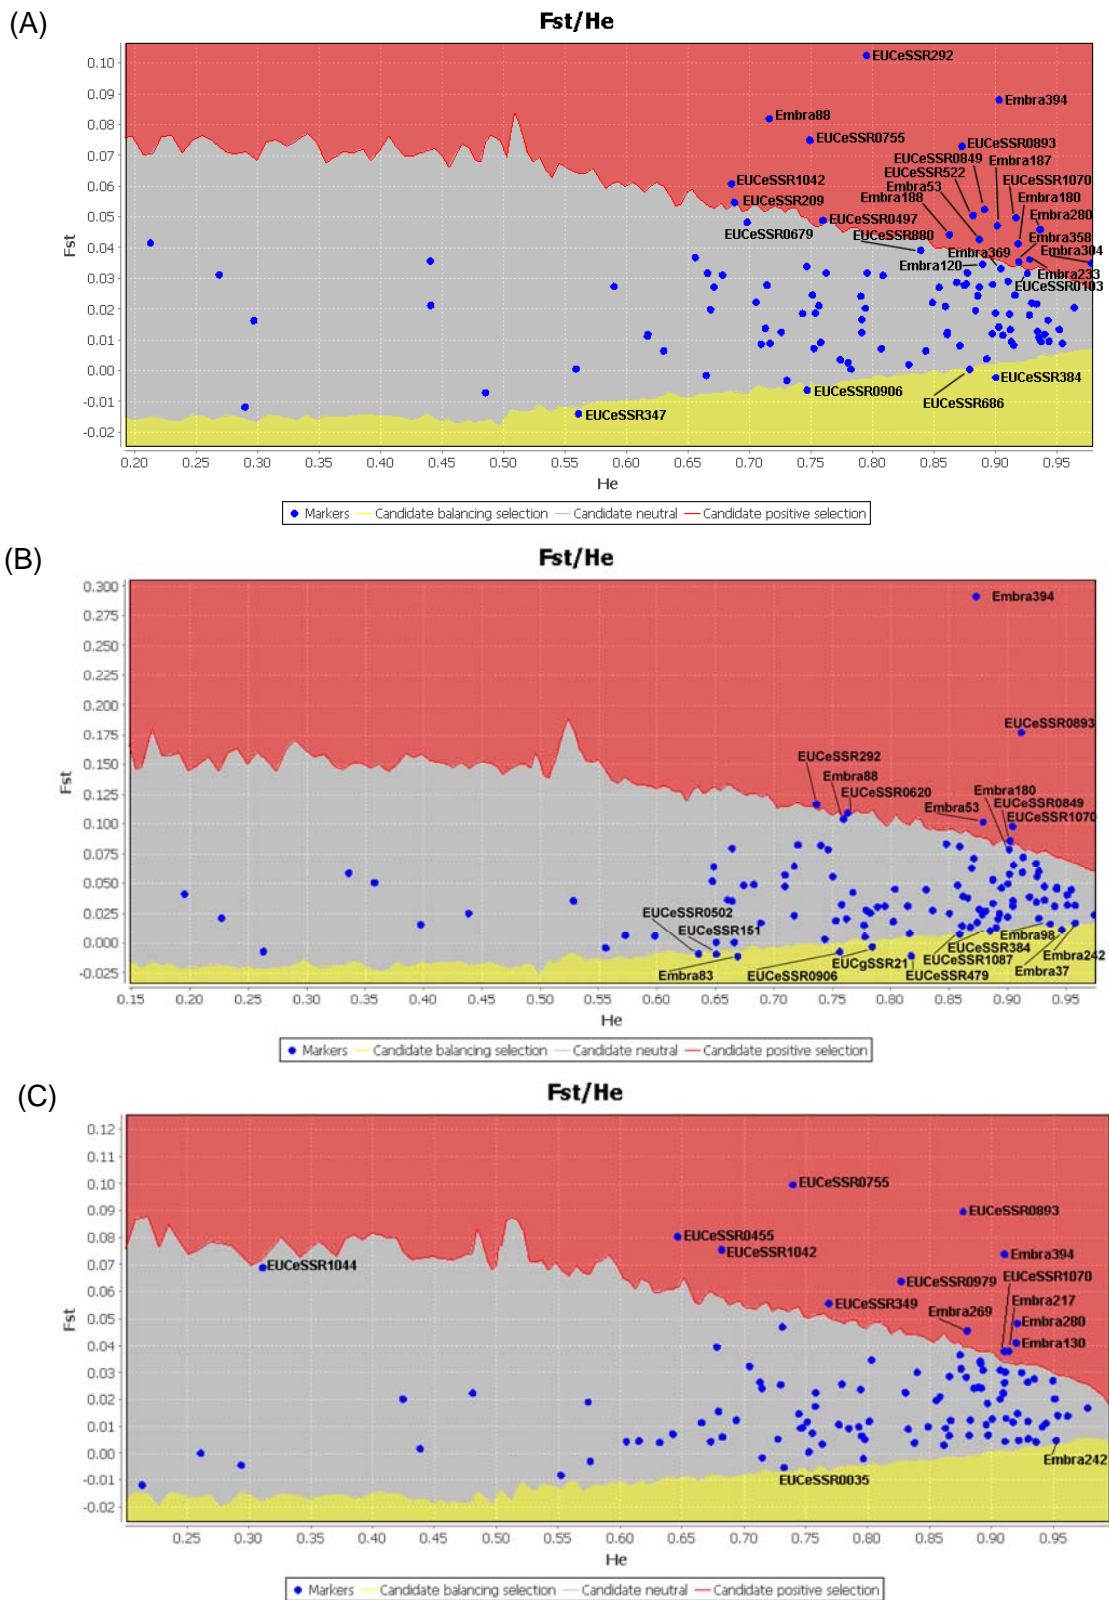

**Supplementary Figure S2. Distribution of  $F_{ST}$  values for all the 110 SSR loci at 95 % and 5 % confidence levels as detected with LOSITAN over the three climatic partitions of *E. grandis* populations. (A) mean annual temperature; (B) isothermality; (C) annual precipitation.**

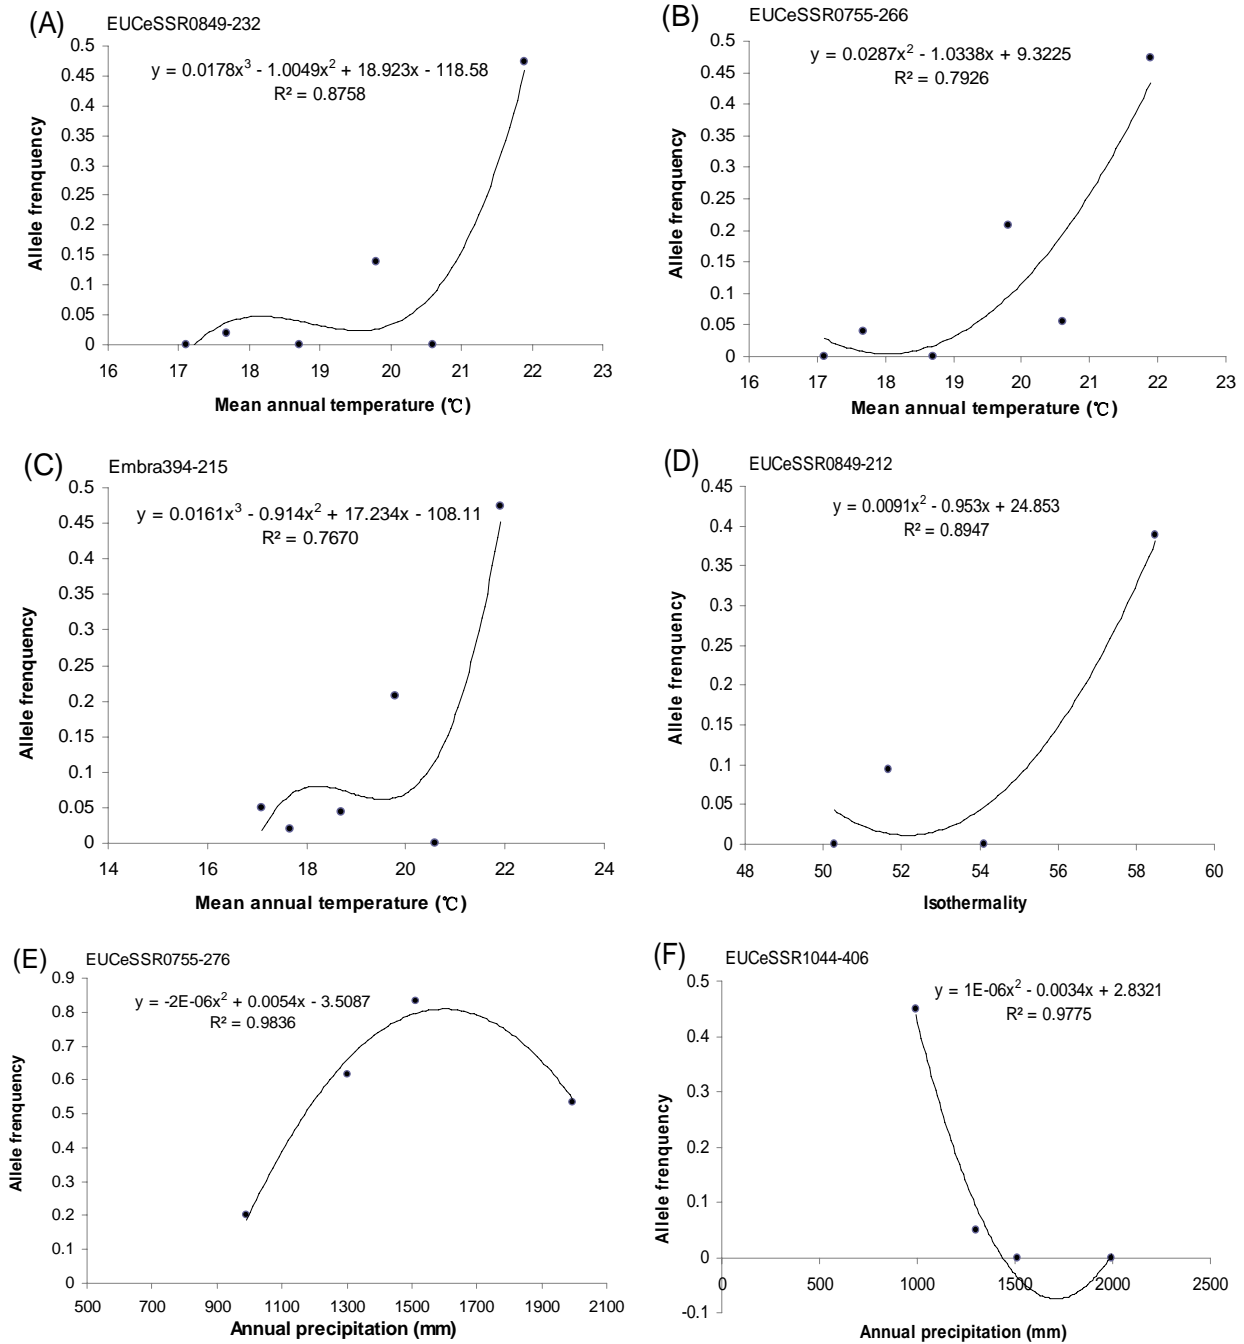

**Supplementary Figure S3. Non-linear regression for six significant associations between  $F_{ST}$  outlier allele frequencies and climatic variables.** Each dot represents a group of homogeneous populations in  $K$ -means climatic partition. (A, B, C) the alleles 232, 266 and 215 bp of loci EUCeSSR0849, EUCeSSR0755 and Embra394 associated significantly with mean annual temperature, respectively; (D) the 212 bp allele of EUCeSSR0849 associated significantly with isothermality; (E, F) the alleles 276 and 406 bp of loci EUCeSSR0755 and EUCeSSR1044 associated significantly with annual precipitation, respectively.

**Supplementary Table S1. SSR markers, their functional annotations and physical positions in *E. grandis* genome sequence (version 1.1, <http://www.phytozome.net/eucalyptus.php>)**

| No. | SSR marker     | Marker source     |                               | Putative function at $E \leq 10^{-5}$<br>[Organism; BlastX <i>E</i> value]                          | Physical position on <i>E. grandis</i> genome |            |          |              |                |
|-----|----------------|-------------------|-------------------------------|-----------------------------------------------------------------------------------------------------|-----------------------------------------------|------------|----------|--------------|----------------|
|     |                | GenBank accession | Reference                     |                                                                                                     | Scaffold                                      | Start (bp) | End (bp) | Identity (%) | <i>E</i> value |
| 1   | EUCeSSR1061    | Pr016588736       | Zhou <i>et al.</i> , 2014     | No significant match                                                                                | 1                                             | 8690373    | 8690158  | 100.0        | 1E-118         |
| 2   | EUCeSSR1039    | Pr016588725       | Zhou <i>et al.</i> , 2014     | VHS and GAT domain-containing protein<br>[ <i>Arabidopsis thaliana</i> ; 2E-12]                     | 1                                             | 10253398   | 10253454 | 98.3         | 1E-21          |
| 3   | Embra180       | BV682124          | Brondani <i>et al.</i> , 2006 | No significant match                                                                                | 1                                             | 16237395   | 16237490 | 95.8         | 8E-40          |
| 4   | Embra366*      | BV682836          | Brondani <i>et al.</i> , 2006 | Predicted: zinc-metalloproteinase, peroxisomal-like<br>[ <i>Eucalyptus grandis</i> ; 5E-14]         | 1                                             | 28485149   | 28485018 | 97.0         | 6E-59          |
|     |                |                   |                               |                                                                                                     | 5                                             | 20388443   | 20388312 | 97.0         | 6E-59          |
| 5   | EUCeSSR485     | Pr010837364       | He <i>et al.</i> , 2012       | Similar to hydroxyproline-rich glycoprotein family protein<br>[ <i>Vitis vinifera</i> ; 2E-14]      | 1                                             | 28493543   | 28493043 | 99.4         | 0              |
| 6   | Embra100       | BV682837          | Brondani <i>et al.</i> , 2006 | Predicted: transparent testa 12-like<br>[ <i>Eucalyptus grandis</i> ; 6E-19]                        | 1                                             | 31237609   | 31237427 | 100.0        | 1E-98          |
| 7   | EUCeSSR0333†NA |                   | Zhou <i>et al.</i> , 2014     | No significant match                                                                                | 1                                             | 34568399   | 34568193 | 99.5         | 1E-110         |
| 8   | EUCeSSR347     | Pr010837326       | He <i>et al.</i> , 2012       | Protein exordium like 3<br>[ <i>Arabidopsis thaliana</i> ; 2E-09]                                   | 1                                             | 39170916   | 39171023 | 99.1         | 2E-51          |
| 9   | EUCeSSR1136    | Pr016588533       | Zhou <i>et al.</i> , 2010     | Light-harvesting complex I chlorophyll A/B-binding protein<br>[ <i>Medicago truncatula</i> ; 9E-70] | 2                                             | 6868216    | 6867926  | 99.3         | 6E-156         |
| 10  | Embra98        | BV682070          | Brondani <i>et al.</i> , 2006 | No significant match                                                                                | 2                                             | 12452178   | 12452441 | 89.4         | 8E-79          |
| 11  | EUCeSSR0502    | Pr016588591       | Zhou <i>et al.</i> , 2014     | No significant match                                                                                | 2                                             | 19852092   | 19851718 | 94.7         | 1E-166         |
| 12  | EUCeSSR0224    | Pr016588560       | Zhou <i>et al.</i> , 2014     | 40S ribosomal protein s24<br>[ <i>Cucumis melo</i> subsp. <i>melo</i> ; 5E-78]                      | 2                                             | 31569263   | 31569595 | 98.2         | 1E-171         |

| No. | SSR marker   | Marker source     |                               | Putative function at $E \leq 10^{-5}$<br>[Organism; BlastX $E$ value]                                     | Physical position on <i>E. grandis</i> genome |            |          |              |           |
|-----|--------------|-------------------|-------------------------------|-----------------------------------------------------------------------------------------------------------|-----------------------------------------------|------------|----------|--------------|-----------|
|     |              | GenBank accession | Reference                     |                                                                                                           | Scaffold                                      | Start (bp) | End (bp) | Identity (%) | $E$ value |
| 13  | EUCeSSR0276  | Pr016588569       | Zhou <i>et al.</i> , 2014     | DNA binding protein, putative<br>[ <i>Ricinus communis</i> ; 2E-38]                                       | 2                                             | 37569214   | 37569335 | 98.4         | 8E-58     |
| 14  | Embra333     | BV682202          | Brondani <i>et al.</i> , 2006 | Transcriptional regulator<br>SUPERMAN, putative<br>[ <i>Theobroma cacao</i> ; 3E-17]                      | 2                                             | 44098015   | 44098200 | 98.9         | 8E-96     |
| 15  | Embra201     | BV682141          | Brondani <i>et al.</i> , 2006 | No significant match                                                                                      | 2                                             | 49421201   | 49421081 | 98.4         | 4E-57     |
| 16  | EUCeSSR0930* | Pr016588682       | Zhou <i>et al.</i> , 2014     | Hypothetical VITISV_024902<br>[ <i>Vitis vinifera</i> ; 2E-25]                                            | 2                                             | 52914039   | 52913627 | 95.9         | 0         |
|     |              |                   |                               |                                                                                                           | 5                                             | 17599471   | 17599056 | 97.6         | 0         |
| 17  | EUCeSSR410   | Pr010837342       | He <i>et al.</i> , 2012       | No significant match                                                                                      | 2                                             | 60757654   | 60757309 | 99.4         | 0         |
| 18  | EUCeSSR0979  | Pr016588702       | Zhou <i>et al.</i> , 2014     | Hypothetical protein<br>ARALYDRAFT_491646<br>[ <i>Arabidopsis lyrata</i> subsp.<br><i>lyrata</i> ; 9E-59] | 3                                             | 7090509    | 7090657  | 100.0        | 1E-78     |
| 19  | Embra115     | BV682077          | Brondani <i>et al.</i> , 2006 | No significant match                                                                                      | 3                                             | 11491555   | 11491340 | 98.6         | 1E-112    |
| 20  | Embra227     | BV682257          | Brondani <i>et al.</i> , 2006 | No significant match                                                                                      | 3                                             | 13582421   | 13582257 | 97.6         | 4E-77     |
| 21  | EUCeSSR1060  | Pr016588522       | Zhou <i>et al.</i> , 2010     | Transmembrane protein,<br>putative<br>[ <i>Medicago truncatula</i> ; 5E-42]                               | 3                                             | 13597010   | 13597399 | 96.4         | 0         |
| 22  | Embra280     | BV682184          | Brondani <i>et al.</i> , 2006 | No significant match                                                                                      | 3                                             | 25904848   | 25904985 | 95.0         | 3E-52     |
| 23  | Embra377     | BV682218          | Brondani <i>et al.</i> , 2006 | No significant match                                                                                      | 3                                             | 29789569   | 29789756 | 99.5         | 2E-97     |
| 24  | Embra321     | BV682198          | Brondani <i>et al.</i> , 2006 | Predicted: U-box domain-<br>containing protein 35-like<br>[ <i>Eucalyptus grandis</i> ; 1E-12]            | 3                                             | 39424661   | 39424785 | 99.2         | 9E-62     |
| 25  | EUCeSSR313   | Pr010837314       | He <i>et al.</i> , 2012       | No significant match                                                                                      | 3                                             | 40581763   | 40582032 | 97.0         | 1E-135    |
| 26  | EUCeSSR0857  | Pr016588658       | Zhou <i>et al.</i> , 2014     | 4-coumarate:CoA ligase<br>[ <i>Eucalyptus camaldulensis</i> ;<br>1E-84]                                   | 3                                             | 42700560   | 42700039 | 94.9         | 0         |

| No. | SSR marker  | Marker source     |                               | Putative function at $E \leq 10^{-5}$<br>[Organism; BlastX $E$ value]                                | Physical position on <i>E. grandis</i> genome |            |          |              |           |
|-----|-------------|-------------------|-------------------------------|------------------------------------------------------------------------------------------------------|-----------------------------------------------|------------|----------|--------------|-----------|
|     |             | GenBank accession | Reference                     |                                                                                                      | Scaffold                                      | Start (bp) | End (bp) | Identity (%) | $E$ value |
| 27  | EUCeSSR384† | Pr010837336       | He <i>et al.</i> , 2012       | Predicted: aspartate aminotransferase, chloroplastic-like<br>[ <i>Eucalyptus grandis</i> ; 7E-22]    | 3                                             | 52236288   | 52236605 | 99.7         | 1E-176    |
| 28  | Embra125    | BV682083          | Brondani <i>et al.</i> , 2006 | No significant match                                                                                 | 3                                             | 52337372   | 52337243 | 99.2         | 4E-65     |
| 29  | EUCeSSR0599 | Pr016588608       | Zhou <i>et al.</i> , 2014     | No significant match                                                                                 | 4                                             | 7631897    | 7631979  | 98.8         | 6E-37     |
| 30  | Embra130    | BV682088          | Brondani <i>et al.</i> , 2006 | No significant match                                                                                 | 4                                             | 12276418   | 12276731 | 100.0        | 6E-66     |
| 31  | EUCeSSR0035 | Pr016588538       | Zhou <i>et al.</i> , 2014     | GTP-binding protein rab-2 homolog<br>[ <i>Ciona intestinalis</i> ; 1E-09]                            | 4                                             | 17497132   | 17497192 | 92.2         | 3E-41     |
| 32  | EUCeSSR0803 | Pr016588646       | Zhou <i>et al.</i> , 2014     | Adenosine 5' phosphosulfate reductase<br>[ <i>Populus tremula</i> x <i>P. alba</i> ; 2E-58]          | 4                                             | 23911715   | 23911715 | 96.8         | 2E-71     |
| 33  | EUCeSSR151  | Pr010837266       | He <i>et al.</i> , 2012       | No significant match                                                                                 | 4                                             | 35595018   | 35594867 | 98.7         | 3E-75     |
| 34  | EUCeSSR686† | Pr010837404       | He <i>et al.</i> , 2012       | No significant match                                                                                 | 4                                             | 36831665   | 36831351 | 99.4         | 1E-170    |
| 35  | EUCeSSR0862 | Pr016588660       | Zhou <i>et al.</i> , 2014     | Arginine/serine-rich splicing factor 31<br>[ <i>Arabidopsis lyrata</i> subsp. <i>lyrata</i> ; 6E-13] | 4                                             | 37785686   | 37785165 | 97.3         | 0         |
| 36  | Embra242    | BV682178          | Brondani <i>et al.</i> , 2006 | No significant match                                                                                 | 5                                             | 915509     | 915386   | 99.2         | 3E-61     |
| 37  | EUCeSSR840  | Pr010837435       | He <i>et al.</i> , 2012       | Cinnamoyl-CoA reductase<br>[ <i>Ricinus communis</i> ; 2E-69]                                        | 5                                             | 2602306    | 2602519  | 98.6         | 1E-108    |
| 38  | Embra120    | BV682081          | Brondani <i>et al.</i> , 2006 | No significant match                                                                                 | 5                                             | 3395332    | 3395550  | 96.8         | 2E-105    |
| 39  | Embra41     | BV682033          | Brondani <i>et al.</i> , 2006 | No significant match                                                                                 | 5                                             | 4524839    | 4525010  | 98.8         | 3E-75     |
| 40  | EUCeSSR626  | Pr010837388       | He <i>et al.</i> , 2012       | Phosphoglycerate mutase, putative<br>[ <i>Ricinus communis</i> ; 2E-44]                              | 5                                             | 6125193    | 6124889  | 99.0         | 1E-163    |
| 41  | Embra64     | BV682234          | Brondani <i>et al.</i> , 2006 | No significant match                                                                                 | 5                                             | 12244555   | 12244784 | 94.8         | 1E-95     |
| 42  | Embra111    | BV682074          | Brondani <i>et al.</i> , 2006 | No significant match                                                                                 | 5                                             | 32787727   | 32787575 | 90.2         | 3E-50     |
| 43  | Embra370    | BV682215          | Brondani <i>et al.</i> , 2006 | No significant match                                                                                 | 5                                             | 41971188   | 41971422 | 89.4         | 1E-75     |

| No. | SSR marker  | Marker source     |                               | Putative function at $E \leq 10^{-5}$<br>[Organism; BlastX $E$ value]                          | Physical position on <i>E. grandis</i> genome |            |          |              |           |
|-----|-------------|-------------------|-------------------------------|------------------------------------------------------------------------------------------------|-----------------------------------------------|------------|----------|--------------|-----------|
|     |             | GenBank accession | Reference                     |                                                                                                | Scaffold                                      | Start (bp) | End (bp) | Identity (%) | $E$ value |
| 44  | EUCeSSR0455 | Pr016588583       | Zhou <i>et al.</i> , 2014     | Hypothetical MTR_1g050940<br>[ <i>Medicago truncatula</i> ; 2E-15]                             | 5                                             | 44544967   | 44545383 | 97.4         | 0         |
| 45  | Embra358    | BV682263          | Brondani <i>et al.</i> , 2006 | No significant match                                                                           | 5                                             | 47099301   | 47099219 | 100.0        | 3E-39     |
| 46  | Embra304    | BV682196          | Brondani <i>et al.</i> , 2006 | Hypothetical<br>EUGRSUZ_E02918<br>[ <i>Eucalyptus grandis</i> ; 3E-23]                         | 5                                             | 48126124   | 48126411 | 98.6         | 1E-149    |
| 47  | EUCeSSR0103 | Pr016588546       | Zhou <i>et al.</i> , 2014     | No significant match                                                                           | 5                                             | 54687233   | 54687339 | 95.4         | 9E-39     |
| 48  | Embra188    | BV682130          | Brondani <i>et al.</i> , 2006 | No significant match                                                                           | 5                                             | 58140803   | 58140472 | 99.1         | 3E-180    |
| 49  | EUCeSSR0906 | Pr016588672       | Zhou <i>et al.</i> , 2014     | Hypothetical MTR_2g104400<br>[ <i>Medicago truncatula</i> ; 3E-57]                             | 5                                             | 60339030   | 60338720 | 98.4         | 1E-160    |
| 50  | Embra37‡    | NA                | Brondani <i>et al.</i> , 2006 | NA                                                                                             | 5                                             | 68798617   | 68798743 | –            | –         |
| 51  | EUCeSSR1134 | Pr016588767       | Zhou <i>et al.</i> , 2014     | Hypothetical protein<br>SORBIDRAFT_02g033820<br>[ <i>Sorghum bicolor</i> ; 6E-36]              | 5                                             | 73814771   | 73814707 | 100.0        | 1E-28     |
| 52  | Embra187    | BV682129          | Brondani <i>et al.</i> , 2006 | L-ascorbate oxidase<br>[ <i>Morus notabilis</i> ; 4E-12]                                       | 6                                             | 7689616    | 7689783  | 96.4         | 2E-77     |
| 53  | EUCeSSR346  | Pr010837325       | He <i>et al.</i> , 2012       | GDP-L-galactose<br>guanylyltransferase<br>[ <i>Rosa roxburghii</i> ; 1E-63]                    | 6                                             | 9407858    | 9407463  | 98.2         | 0         |
| 54  | EUCeSSR0755 | Pr016588638       | Zhou <i>et al.</i> , 2014     | No significant match                                                                           | 6                                             | 14024833   | 14025371 | 94.5         | 0         |
| 55  | EUCeSSR0705 | Pr016588631       | Zhou <i>et al.</i> , 2014     | TCP domain class<br>transcription factor<br>[ <i>Malus x domestica</i> ; 1E-24]                | 6                                             | 15308410   | 15307977 | 99.1         | 0         |
| 56  | Embra196    | BV682136          | Brondani <i>et al.</i> , 2006 | No significant match                                                                           | 6                                             | 19255449   | 19255309 | 98.6         | 7E-69     |
| 57  | Embra233    | BV682169          | Brondani <i>et al.</i> , 2006 | No significant match                                                                           | 6                                             | 24277671   | 24277564 | 99.1         | 9E-52     |
| 58  | EUCeSSR338  | Pr010837321       | He <i>et al.</i> , 2012       | Dehydration-responsive<br>element binding protein 3<br>[ <i>Asparagus officinalis</i> ; 2E-12] | 6                                             | 34000528   | 34000073 | 93.5         | 0         |
| 59  | EUCeSSR231  | Pr010837287       | He <i>et al.</i> , 2012       | SLL1 protein<br>[ <i>Primula vulgaris</i> ; 2E-28]                                             | 6                                             | 35460737   | 35461161 | 98.6         | 0         |



| No. | SSR marker  | Marker source     |                               | Putative function at $E \leq 10^{-5}$<br>[Organism; BlastX $E$ value]                                | Physical position on <i>E. grandis</i> genome |            |          |              |           |
|-----|-------------|-------------------|-------------------------------|------------------------------------------------------------------------------------------------------|-----------------------------------------------|------------|----------|--------------|-----------|
|     |             | GenBank accession | Reference                     |                                                                                                      | Scaffold                                      | Start (bp) | End (bp) | Identity (%) | $E$ value |
| 60  | EUCeSSR0959 | Pr016588693       | Zhou <i>et al.</i> , 2014     | F-actin capping protein beta subunit, putative<br>[ <i>Ricinus communis</i> ; 1E-111]                | 6                                             | 36372826   | 36372684 | 93.7         | 3E-56     |
| 61  | EUCeSSR739  | Pr010837417       | He <i>et al.</i> , 2012       | SNARE associated Golgi protein family<br>[ <i>Arabidopsis thaliana</i> ; 2E-44]                      | 6                                             | 39222673   | 39222816 | 98.6         | 3E-70     |
| 62  | EUCeSSR0620 | Pr016588613       | Zhou <i>et al.</i> , 2014     | Cytochrome c-type biogenesis ccda-like chloroplastic protein 2-like<br>[ <i>Glycine max</i> ; 4E-22] | 6                                             | 42424251   | 42424207 | 100.0        | 9E-17     |
| 63  | Embra135    | BV682091          | Brondani <i>et al.</i> , 2006 | No significant match                                                                                 | 6                                             | 45979595   | 45979785 | 97.9         | 2E-92     |
| 64  | Embra345    | BV682206          | Brondani <i>et al.</i> , 2006 | No significant match                                                                                 | 6                                             | 46302395   | 46302603 | 96.7         | 3E-98     |
| 65  | EUCeSSR0776 | Pr016588642       | Zhou <i>et al.</i> , 2014     | Low PSII accumulation 3 protein<br>[ <i>Arabidopsis thaliana</i> ; 2E-48]                            | 6                                             | 47938769   | 47938915 | 100.0        | 1E-77     |
| 66  | EUCeSSR880  | Pr010837440       | He <i>et al.</i> , 2012       | Hypothetical protein<br>[ <i>Vitis vinifera</i> ; 3E-47]                                             | 6                                             | 48283428   | 48283817 | 97.7         | 0         |
| 67  | Embra81     | BV682057          | Brondani <i>et al.</i> , 2006 | Hypothetical<br>EUGRSUZ_F043031<br>[ <i>Eucalyptus grandis</i> ; 2E-14]                              | 6                                             | 53264142   | 53263801 | 99.4         | 0         |
| 68  | EUCeSSR479  | Pr010837362       | He <i>et al.</i> , 2012       | Membrane-anchored endo-1,4-beta-glucanase<br>[ <i>Gossypium hirsutum</i> ; 2E-12]                    | 7                                             | 354399     | 354065   | 96.7         | 1E-165    |
| 69  | EUCeSSR1042 | Pr016588727       | Zhou <i>et al.</i> , 2014     | Potassium channel 2<br>[ <i>Populus tremula</i> x <i>P. tremuloides</i> ; 6E-28]                     | 7                                             | 9980448    | 9980798  | 97.2         | 1E-175    |
| 70  | Embra7      | BV682006          | Brondani <i>et al.</i> , 2006 | No significant match                                                                                 | 7                                             | 27204059   | 27203932 | 99.2         | 1E-63     |
| 71  | Embra83     | BV682059          | Brondani <i>et al.</i> , 2006 | No significant match                                                                                 | 7                                             | 47970364   | 47970228 | 87.6         | 2E-32     |
| 72  | EUCeSSR0875 | Pr016588663       | Zhou <i>et al.</i> , 2014     | Major intrinsic protein PIPa2<br>[ <i>Craterostigma plantagineum</i> ; 7E-58]                        | 7                                             | 48997063   | 48996432 | 97.3         | 0         |
| 73  | Embra369    | BV682214          | Brondani <i>et al.</i> , 2006 | No significant match                                                                                 | 7                                             | 49475352   | 49475508 | 100.0        | 4E-83     |

| No. | SSR marker  | Marker source     |                               | Putative function at $E \leq 10^{-5}$<br>[Organism; BlastX $E$ value]                            | Physical position on <i>E. grandis</i> genome |            |          |              |           |
|-----|-------------|-------------------|-------------------------------|--------------------------------------------------------------------------------------------------|-----------------------------------------------|------------|----------|--------------|-----------|
|     |             | GenBank accession | Reference                     |                                                                                                  | Scaffold                                      | Start (bp) | End (bp) | Identity (%) | $E$ value |
| 74  | EUCeSSR1087 | Pr016588747       | Zhou <i>et al.</i> , 2014     | Leunig-like protein<br>[ <i>Arabidopsis thaliana</i> ; 6E-64]                                    | 8                                             | 631971     | 631749   | 99.6         | 3E-120    |
| 75  | EUCgSSR21   | Pr010703614       | He <i>et al.</i> , 2011       | Xyloglucan<br>glycosyltransferase 6-like,<br>putative<br>[ <i>Gossypium arboreum</i> ;<br>1E-75] | 8                                             | 9682075    | 9682227  | 100.0        | 5E-81     |
| 76  | EUCeSSR683  | Pr010837402       | He <i>et al.</i> , 2012       | No significant match                                                                             | 8                                             | 11862587   | 11862800 | 99.1         | 4E-112    |
| 77  | EUCeSSR522  | Pr010837369       | He <i>et al.</i> , 2012       | Esterase/lipase domain-<br>containing protein<br>[ <i>Arabidopsis thaliana</i> ; 1E-66]          | 8                                             | 15487717   | 15488064 | 100.0        | 0         |
| 78  | Embra197    | BV682137          | Brondani <i>et al.</i> , 2006 | No significant match                                                                             | 8                                             | 33444065   | 33444325 | 99.6         | 1E-143    |
| 79  | Embra150‡   | NA                | Brondani <i>et al.</i> , 2006 | NA                                                                                               | 8                                             | 40661762   | 40661894 | –            | –         |
| 80  | EUCeSSR0163 | Pr016588551       | Zhou <i>et al.</i> , 2014     | Actin depolymerizing factor 4<br>[ <i>Gossypium hirsutum</i> ; 7E-81]                            | 8                                             | 44710190   | 44710369 | 98.9         | 3E-92     |
| 81  | EUCeSSR1070 | Pr016588742       | Zhou <i>et al.</i> , 2014     | Predicted: CASP-like<br>At3g23200<br>[ <i>Vitis vinifera</i> ; 1E-38]                            | 8                                             | 45480459   | 45480283 | 96.6         | 6E-81     |
| 82  | Embra88     | BV682063          | Brondani <i>et al.</i> , 2006 | No significant match                                                                             | 8                                             | 49475797   | 49476075 | 98.6         | 1E-145    |
| 83  | Embra53     | BV682042          | Brondani <i>et al.</i> , 2006 | No significant match                                                                             | 8                                             | 56361679   | 56361842 | 100.0        | 1E-74     |
| 84  | EUCeSSR0226 | Pr016588561       | Zhou <i>et al.</i> , 2014     | Nuclear transport factor,<br>putative<br>[ <i>Ricinus communis</i> ; 7E-30]                      | 8                                             | 64788519   | 64788192 | 95.4         | 1E-149    |
| 85  | EUCeSSR0497 | Pr016588588       | Zhou <i>et al.</i> , 2014     | ACT domain-containing<br>protein, partial<br>[ <i>Silene latifolia</i> ; 9E-70]                  | 8                                             | 66205158   | 66204944 | 97.7         | 1E-105    |
| 86  | EUCeSSR0845 | Pr016588653       | Zhou <i>et al.</i> , 2014     | NAC domain protein,<br>IPR003441<br>[ <i>Populus trichocarpa</i> ; 5E-108]                       | 9                                             | 961917     | 961845   | 100.0        | 2E-33     |
| 87  | EUCeSSR1125 | Pr016588762       | Zhou <i>et al.</i> , 2014     | No significant match                                                                             | 9                                             | 3873376    | 3873504  | 97.7         | 1E-59     |

| No. | SSR marker  | Marker source     |                               | Putative function at $E \leq 10^{-5}$<br>[Organism; BlastX $E$ value]                                     | Physical position on <i>E. grandis</i> genome |            |          |              |           |
|-----|-------------|-------------------|-------------------------------|-----------------------------------------------------------------------------------------------------------|-----------------------------------------------|------------|----------|--------------|-----------|
|     |             | GenBank accession | Reference                     |                                                                                                           | Scaffold                                      | Start (bp) | End (bp) | Identity (%) | $E$ value |
| 88  | EUCeSSR0592 | Pr016588607       | Zhou <i>et al.</i> , 2014     | Ubiquitin-like protein<br>[ <i>Arabidopsis thaliana</i> ; 2E-32]                                          | 9                                             | 25296628   | 25296965 | 97.6         | 1E-170    |
| 89  | EUCeSSR0909 | Pr016588674       | Zhou <i>et al.</i> , 2014     | Hypothetical protein<br>ARALYDRAFT_471189<br>[ <i>Arabidopsis lyrata</i> subsp.<br><i>lyrata</i> ; 6E-25] | 9                                             | 27543468   | 27543222 | 93.1         | 5E-88     |
| 90  | Embra217    | BV682155          | Brondani <i>et al.</i> , 2006 | No significant match                                                                                      | 9                                             | 38397371   | 38397559 | 100.0        | 1E-102    |
| 91  | EUCeSSR0679 | Pr016588623       | Zhou <i>et al.</i> , 2014     | No significant match                                                                                      | 10                                            | 466663     | 466821   | 91.8         | 2E-62     |
| 92  | EUCeSSR596  | Pr010837383       | He <i>et al.</i> , 2012       | Nodulin MtN21 family protein<br>[ <i>Arabidopsis. lyrata</i> subsp.<br><i>lyrata</i> ; 6E-41]             | 10                                            | 1657928    | 1658151  | 98.2         | 1E-100    |
| 93  | Embra40     | BV682229          | Brondani <i>et al.</i> , 2006 | No significant match                                                                                      | 10                                            | 10043414   | 10043335 | 100.0        | 2E-37     |
| 94  | EUCeSSR1044 | Pr016588729       | Zhou <i>et al.</i> , 2014     | Zinc finger, C3HC4 type<br>(RING finger) protein<br>[ <i>Medicago truncatula</i> ; 5E-69]                 | 10                                            | 22822844   | 22823183 | 99.1         | 0         |
| 95  | EUCeSSR0568 | Pr016588604       | Zhou <i>et al.</i> , 2014     | C-4 methyl sterol oxidase,<br>putative<br>[ <i>Ricinus communis</i> ; 3E-90]                              | 10                                            | 26059346   | 26059495 | 99.3         | 3E-76     |
| 96  | EUCeSSR0126 | Pr016588548       | Zhou <i>et al.</i> , 2014     | High mobility group B3<br>protein<br>[ <i>Arabidopsis thaliana</i> ; 2E-35]                               | 10                                            | 31255535   | 31255866 | 99.1         | 7E-147    |
| 97  | Embra394    | BV682223          | Brondani <i>et al.</i> , 2006 | Predicted: thionin-like protein<br>2<br>[ <i>Eucalyptus grandis</i> ; 7E-34]                              | 10                                            | 37285686   | 37285508 | 94.7         | 4E-80     |
| 98  | Embra87     | BV682062          | Brondani <i>et al.</i> , 2006 | No significant match                                                                                      | 11                                            | 3914954    | 3914887  | 100.0        | 6E-30     |
| 99  | Embra165    | BV682112          | Brondani <i>et al.</i> , 2006 | No significant match                                                                                      | 11                                            | 4343680    | 4343529  | 100.0        | 2E-80     |
| 100 | Embra326    | BV682200          | Brondani <i>et al.</i> , 2006 | No significant match                                                                                      | 11                                            | 6199457    | 6199533  | 98.7         | 6E-34     |
| 101 | EUCeSSR1117 | Pr016588761       | Zhou <i>et al.</i> , 2014     | No significant match                                                                                      | 11                                            | 9172710    | 9172816  | 99.1         | 8E-51     |
| 102 | EUCeSSR0893 | Pr016588666       | Zhou <i>et al.</i> , 2014     | No significant match                                                                                      | 11                                            | 18351676   | 18351451 | 91.6         | 2E-69     |
| 103 | Embra269    | BV682181          | Brondani <i>et al.</i> , 2006 | No significant match                                                                                      | 11                                            | 20369552   | 20369725 | 98.3         | 2E-87     |

| No. | SSR marker  | Marker source     |                               | Putative function at $E \leq 10^{-5}$<br>[Organism; BlastX $E$ value]                      | Physical position on <i>E. grandis</i> genome |            |          |              |           |
|-----|-------------|-------------------|-------------------------------|--------------------------------------------------------------------------------------------|-----------------------------------------------|------------|----------|--------------|-----------|
|     |             | GenBank accession | Reference                     |                                                                                            | Scaffold                                      | Start (bp) | End (bp) | Identity (%) | $E$ value |
| 104 | EUCeSSR1021 | Pr016588718       | Zhou <i>et al.</i> , 2014     | Succinic semialdehyde reductase isoform1<br>[ <i>Solanum lycopersicum</i> ; 5E-121]        | 11                                            | 30521569   | 30521634 | 95.5         | 3E-22     |
| 105 | EUCeSSR292  | Pr010837306       | He <i>et al.</i> , 2012       | LAX4 protein<br>[ <i>Solanum lycopersicum</i> ; 5E-10]                                     | 11                                            | 38058752   | 38058500 | 97.2         | 1E-123    |
| 106 | EUCeSSR349  | Pr010837328       | He <i>et al.</i> , 2012       | Histone h2<br>[ <i>Populus trichocarpa</i> ; 7E-21]                                        | 11                                            | 40253366   | 40253636 | 99.3         | 1E-146    |
| 107 | EUCeSSR209  | Pr010837283       | He <i>et al.</i> , 2012       | 60S ribosomal protein L12<br>[ <i>Capsicum annuum</i> ; 3E-104]                            | 11                                            | 41279073   | 41278307 | 98.2         | 0         |
| 108 | EUCeSSR0849 | Pr016588654       | Zhou <i>et al.</i> , 2014     | Predicted: uncharacterized protein LOC104426570<br>( <i>Eucalyptus grandis</i> ; 2E-26)    | 11                                            | 41365756   | 41365569 | 99.5         | 6E-99     |
| 109 | Embra258    | BV682180          | Brondani <i>et al.</i> , 2006 | No significant match                                                                       | 11                                            | 45979595   | 45979785 | 97.9         | 1E-92     |
| 110 | EUCeSSR1145 | Pr016588769       | Zhou <i>et al.</i> , 2014     | Heavy-metal-associated domain-containing protein<br>[ <i>Arabidopsis thaliana</i> ; 3E-32] | 14                                            | 855263     | 855161   | 98.1         | 2E-46     |

\* Each of Embra366 and EUCeSSR0930 had two matches on different scaffolds in *E. grandis* genome sequence.

† EUCeSSR0333, EUCeSSR384 and EUCeSSR686 were homologous to EST3 (Acuña *et al.*, 2012), Embra243 (also Embra286, Brondani *et al.*, 2006) and Embra1481 (Faria *et al.*, 2011), respectively.

‡ No marker sequence was available for Embra37 and Embra150, and their primer sequences were thus used to align with *E. grandis* genome.

**Supplementary Table S2. Genetic parameters for 110 polymorphic SSR loci in *E. grandis* populations**

| No.* | SSR locus             | $N_A^\dagger$ | $H_O$ | $H_E$ | $F$    | $F_{IT}$ | $F_{IS}$ | $F_{ST}$ | $PIC^\ddagger$ | NAF   | $A_R$ | HWE $^\S$ |
|------|-----------------------|---------------|-------|-------|--------|----------|----------|----------|----------------|-------|-------|-----------|
| 1    | EUCeSSR1061           | 15            | 0.641 | 0.732 | 0.115  | 0.175    | 0.172    | 0.004    | 0.782          | 0.066 | 2.945 | **        |
| 2    | EUCeSSR1039           | 6             | 0.592 | 0.610 | 0.025  | 0.103    | 0.103    | 0.000    | 0.703          | 0.041 | 2.459 | **        |
| 3    | Embri180              | 20            | 0.724 | 0.795 | 0.099  | 0.194    | 0.137    | 0.066    | 0.898          | 0.047 | 3.479 |           |
| 4    | Embri366              | 25            | 0.771 | 0.784 | 0.010  | 0.121    | 0.080    | 0.044    | 0.870          | 0.027 | 3.336 |           |
| 5    | EUCeSSR485            | 8             | 0.694 | 0.701 | 0.007  | 0.067    | 0.058    | 0.009    | 0.710          | 0.016 | 2.768 |           |
| 6    | Embri100              | 21            | 0.449 | 0.778 | 0.440  | 0.500    | 0.481    | 0.036    | 0.861          | 0.184 | 3.490 | **        |
| 7    | EUCeSSR0333           | 17            | 0.556 | 0.785 | 0.294  | 0.366    | 0.341    | 0.038    | 0.873          | 0.127 | 3.351 |           |
| 8    | EUCeSSR347            | 5             | 0.787 | 0.545 | -0.459 | -0.387   | -0.412   | 0.018    | 0.519          | 0.001 | 2.168 |           |
| 9    | EUCeSSR1136           | 29            | 0.435 | 0.767 | 0.431  | 0.495    | 0.502    | -0.014   | 0.824          | 0.177 | 3.240 |           |
| 10   | Embri98 <sup>¶</sup>  | 24            | 0.688 | 0.862 | 0.203  | 0.262    | 0.252    | 0.014    | 0.930          | 0.091 | 3.625 | **        |
| 11   | EUCeSSR0502           | 9             | 0.758 | 0.557 | -0.367 | -0.268   | -0.304   | 0.027    | 0.644          | 0.004 | 2.274 | **        |
| 12   | EUCeSSR0224           | 12            | 0.979 | 0.738 | -0.332 | -0.256   | -0.279   | 0.018    | 0.768          | 0.000 | 2.904 | **        |
| 13   | EUCeSSR0276           | 19            | 0.467 | 0.669 | 0.296  | 0.385    | 0.366    | 0.031    | 0.766          | 0.127 | 2.874 |           |
| 14   | Embri333              | 21            | 0.811 | 0.848 | 0.043  | 0.130    | 0.097    | 0.037    | 0.923          | 0.035 | 3.606 |           |
| 15   | Embri201              | 31            | 0.652 | 0.874 | 0.256  | 0.314    | 0.297    | 0.024    | 0.958          | 0.123 | 3.772 |           |
| 16   | EUCeSSR0930           | 5             | 0.303 | 0.275 | -0.081 | -0.044   | -0.044   | 0.001    | 0.259          | 0.014 | 1.561 |           |
| 17   | EUCeSSR410            | 14            | 0.615 | 0.778 | 0.225  | 0.285    | 0.279    | 0.008    | 0.837          | 0.099 | 3.299 |           |
| 18   | EUCeSSR0979           | 12            | 0.613 | 0.667 | 0.079  | 0.215    | 0.134    | 0.093    | 0.788          | 0.033 | 2.985 |           |
| 19   | Embri115 <sup>¶</sup> | 18            | 0.326 | 0.733 | 0.560  | 0.614    | 0.587    | 0.064    | 0.850          | 0.222 | 3.235 | **        |
| 20   | Embri227              | 20            | 0.784 | 0.809 | 0.026  | 0.131    | 0.109    | 0.025    | 0.886          | 0.037 | 3.383 |           |
| 21   | EUCeSSR1060           | 9             | 0.586 | 0.647 | 0.079  | 0.164    | 0.157    | 0.008    | 0.665          | 0.078 | 2.642 |           |
| 22   | Embri280 <sup>¶</sup> | 25            | 0.264 | 0.737 | 0.659  | 0.751    | 0.736    | 0.057    | 0.816          | 0.278 | 3.533 | **        |
| 23   | Embri377              | 23            | 0.448 | 0.808 | 0.450  | 0.508    | 0.499    | 0.017    | 0.871          | 0.188 | 3.575 | **        |
| 24   | Embri321              | 8             | 0.532 | 0.560 | 0.026  | 0.159    | 0.116    | 0.048    | 0.576          | 0.039 | 2.322 |           |
| 25   | EUCeSSR313            | 15            | 0.643 | 0.665 | 0.025  | 0.125    | 0.111    | 0.015    | 0.754          | 0.032 | 2.766 |           |
| 26   | EUCeSSR0857           | 15            | 0.789 | 0.829 | 0.046  | 0.123    | 0.108    | 0.017    | 0.882          | 0.000 | 3.409 |           |
| 27   | EUCeSSR384            | 20            | 0.929 | 0.839 | -0.110 | -0.034   | -0.054   | 0.019    | 0.890          | 0.005 | 3.442 |           |

| No.* | SSR locus             | $N_A^\dagger$ | $H_O$ | $H_E$ | $F$    | $F_{IT}$ | $F_{IS}$ | $F_{ST}$ | $PIC^\ddagger$ | NAF   | $A_R$ | HWE <sup>§</sup> |
|------|-----------------------|---------------|-------|-------|--------|----------|----------|----------|----------------|-------|-------|------------------|
| 28   | Embri125              | 28            | 0.855 | 0.854 | -0.002 | 0.097    | 0.056    | 0.043    | 0.937          | 0.023 | 3.662 |                  |
| 29   | EUCeSSR0599           | 15            | 0.756 | 0.747 | -0.039 | 0.117    | 0.094    | 0.026    | 0.819          | 0.049 | 3.189 |                  |
| 30   | Embri130              | 23            | 0.720 | 0.823 | 0.122  | 0.214    | 0.189    | 0.031    | 0.913          | 0.067 | 3.539 |                  |
| 31   | EUCeSSR0035           | 8             | 0.582 | 0.679 | 0.132  | 0.247    | 0.248    | -0.002   | 0.762          | 0.077 | 2.789 |                  |
| 32   | EUCeSSR0803           | 5             | 0.226 | 0.540 | 0.582  | 0.604    | 0.605    | -0.002   | 0.588          | 0.201 | 2.248 |                  |
| 33   | EUCeSSR151            | 4             | 0.660 | 0.584 | -0.125 | -0.054   | -0.072   | 0.017    | 0.604          | 0.020 | 2.286 | **               |
| 34   | EUCeSSR686            | 14            | 0.911 | 0.829 | -0.101 | -0.028   | -0.044   | 0.015    | 0.874          | 0.009 | 3.378 |                  |
| 35   | EUCeSSR0862           | 17            | 0.810 | 0.696 | -0.174 | -0.073   | -0.109   | 0.032    | 0.765          | 0.014 | 2.884 |                  |
| 36   | Embri242 <sup>¶</sup> | 34            | 0.793 | 0.890 | 0.110  | 0.171    | 0.165    | 0.006    | 0.947          | 0.062 | 3.721 | **               |
| 37   | EUCeSSR840            | 8             | 0.695 | 0.706 | 0.016  | 0.131    | 0.086    | 0.048    | 0.784          | 0.032 | 2.924 | **               |
| 38   | Embri120              | 20            | 0.773 | 0.816 | 0.053  | 0.141    | 0.105    | 0.039    | 0.886          | 0.021 | 3.438 |                  |
| 39   | Embri41               | 20            | 0.770 | 0.826 | 0.070  | 0.152    | 0.122    | 0.034    | 0.900          | 0.034 | 3.488 |                  |
| 40   | EUCeSSR626            | 9             | 0.974 | 0.647 | -0.527 | -0.436   | -0.458   | 0.015    | 0.642          | 0.000 | 2.513 |                  |
| 41   | Embri64               | 18            | 0.715 | 0.675 | -0.064 | 0.035    | -0.008   | 0.042    | 0.745          | 0.008 | 2.838 |                  |
| 42   | Embri111              | 31            | 0.693 | 0.853 | 0.188  | 0.269    | 0.247    | 0.030    | 0.937          | 0.084 | 3.656 |                  |
| 43   | Embri370              | 16            | 0.501 | 0.719 | 0.312  | 0.369    | 0.347    | 0.033    | 0.779          | 0.116 | 2.981 |                  |
| 44   | EUCeSSR0455           | 8             | 0.541 | 0.580 | 0.065  | 0.172    | 0.122    | 0.058    | 0.615          | 0.042 | 2.447 | **               |
| 45   | Embri358              | 22            | 0.761 | 0.846 | 0.101  | 0.178    | 0.156    | 0.027    | 0.922          | 0.045 | 3.577 |                  |
| 46   | Embri304              | 52            | 0.355 | 0.865 | 0.590  | 0.632    | 0.623    | 0.024    | 0.965          | 0.267 | 3.835 | **               |
| 47   | EUCeSSR0103           | 25            | 0.633 | 0.818 | 0.227  | 0.327    | 0.297    | 0.042    | 0.916          | 0.126 | 3.562 |                  |
| 48   | Embri188              | 26            | 0.460 | 0.721 | 0.357  | 0.458    | 0.433    | 0.045    | 0.828          | 0.141 | 3.262 |                  |
| 49   | EUCeSSR0906           | 11            | 0.833 | 0.713 | -0.176 | -0.115   | -0.118   | 0.003    | 0.725          | 0.001 | 2.839 |                  |
| 50   | Embri37               | 32            | 0.820 | 0.870 | 0.056  | 0.119    | 0.101    | 0.020    | 0.934          | 0.038 | 3.654 |                  |
| 51   | EUCeSSR1134           | 17            | 0.752 | 0.792 | 0.054  | 0.132    | 0.105    | 0.030    | 0.851          | 0.037 | 3.265 | **               |
| 52   | Embri187              | 31            | 0.575 | 0.774 | 0.255  | 0.358    | 0.314    | 0.066    | 0.884          | 0.087 | 3.397 | **               |
| 53   | EUCeSSR346            | 25            | 0.625 | 0.835 | 0.253  | 0.309    | 0.296    | 0.020    | 0.907          | 0.119 | 3.512 |                  |
| 54   | EUCeSSR0755           | 9             | 0.514 | 0.582 | 0.119  | 0.304    | 0.179    | 0.151    | 0.680          | 0.057 | 2.689 |                  |
| 55   | EUCeSSR0705           | 3             | 0.209 | 0.200 | -0.019 | 0.098    | 0.042    | 0.060    | 0.316          | 0.021 | 1.434 |                  |
| 56   | Embri196              | 26            | 0.465 | 0.613 | 0.229  | 0.312    | 0.282    | 0.041    | 0.688          | 0.091 | 2.663 |                  |

| No.* | SSR locus           | $N_A^\dagger$ | $H_O$ | $H_E$ | $F$    | $F_{IT}$ | $F_{IS}$ | $F_{ST}$ | $PIC^\ddagger$ | NAF   | $A_R$ | HWE <sup>§</sup> |
|------|---------------------|---------------|-------|-------|--------|----------|----------|----------|----------------|-------|-------|------------------|
| 57   | Emb233              | 20            | 0.780 | 0.794 | 0.026  | 0.156    | 0.106    | 0.056    | 0.863          | 0.030 | 3.511 |                  |
| 58   | EUCeSSR338          | 12            | 0.369 | 0.665 | 0.449  | 0.503    | 0.496    | 0.014    | 0.696          | 0.182 | 2.710 |                  |
| 59   | EUCeSSR231          | 5             | 0.623 | 0.446 | -0.379 | -0.326   | -0.359   | 0.025    | 0.444          | 0.000 | 1.961 |                  |
| 60   | EUCeSSR0959         | 6             | 0.263 | 0.250 | -0.059 | 0.021    | -0.006   | 0.026    | 0.271          | 0.022 | 1.566 | **               |
| 61   | EUCeSSR739          | 7             | 0.633 | 0.662 | 0.049  | 0.113    | 0.086    | 0.028    | 0.680          | 0.046 | 2.623 |                  |
| 62   | EUCeSSR0620         | 9             | 0.798 | 0.633 | -0.260 | -0.163   | -0.218   | 0.044    | 0.644          | 0.003 | 2.563 |                  |
| 63   | Emb135              | 21            | 0.793 | 0.778 | -0.023 | 0.101    | 0.049    | 0.055    | 0.870          | 0.024 | 3.325 |                  |
| 64   | Emb345              | 22            | 0.913 | 0.790 | -0.160 | -0.069   | -0.100   | 0.029    | 0.833          | 0.001 | 3.224 |                  |
| 65   | EUCeSSR0776         | 3             | 0.404 | 0.366 | -0.106 | 0.021    | -0.049   | 0.067    | 0.383          | 0.014 | 1.860 |                  |
| 66   | EUCeSSR880          | 26            | 0.611 | 0.757 | 0.191  | 0.268    | 0.247    | 0.029    | 0.832          | 0.095 | 3.144 |                  |
| 67   | Emb81               | 22            | 0.837 | 0.786 | -0.073 | 0.038    | -0.013   | 0.051    | 0.859          | 0.014 | 3.312 |                  |
| 68   | EUCeSSR479          | 13            | 0.829 | 0.758 | -0.098 | -0.031   | -0.032   | 0.001    | 0.801          | 0.023 | 3.007 |                  |
| 69   | EUCeSSR1042         | 14            | 0.200 | 0.541 | 0.603  | 0.677    | 0.645    | 0.087    | 0.723          | 0.222 | 2.619 |                  |
| 70   | Emb7                | 28            | 0.808 | 0.869 | 0.073  | 0.149    | 0.123    | 0.029    | 0.945          | 0.050 | 3.710 |                  |
| 71   | Emb83               | 15            | 0.410 | 0.611 | 0.311  | 0.427    | 0.410    | 0.030    | 0.719          | 0.130 | 2.661 |                  |
| 72   | EUCeSSR0875         | 6             | 1.000 | 0.671 | -0.502 | -0.414   | -0.446   | 0.022    | 0.659          | 0.000 | 2.617 |                  |
| 73   | Emb369              | 19            | 0.733 | 0.783 | 0.063  | 0.180    | 0.124    | 0.064    | 0.873          | 0.049 | 3.386 |                  |
| 74   | EUCeSSR1087         | 13            | 0.718 | 0.761 | 0.061  | 0.116    | 0.119    | -0.003   | 0.808          | 0.054 | 3.098 |                  |
| 75   | EUCgSSR21           | 11            | 0.672 | 0.734 | 0.085  | 0.164    | 0.153    | 0.013    | 0.802          | 0.071 | 2.958 |                  |
| 76   | EUCeSSR683          | 18            | 0.689 | 0.811 | 0.152  | 0.231    | 0.203    | 0.035    | 0.882          | 0.076 | 3.407 |                  |
| 77   | EUCeSSR522          | 16            | 0.609 | 0.759 | 0.212  | 0.283    | 0.244    | 0.050    | 0.856          | 0.093 | 3.265 |                  |
| 78   | Emb197 <sup>¶</sup> | 19            | 0.869 | 0.852 | -0.020 | 0.053    | 0.044    | 0.010    | 0.912          | 0.025 | 3.521 |                  |
| 79   | Emb150              | 12            | 0.709 | 0.669 | -0.068 | 0.047    | -0.007   | 0.054    | 0.708          | 0.017 | 2.767 |                  |
| 80   | EUCeSSR0163         | 22            | 0.848 | 0.845 | -0.003 | 0.070    | 0.051    | 0.020    | 0.902          | 0.031 | 3.500 | **               |
| 81   | EUCeSSR1070         | 20            | 0.593 | 0.792 | 0.254  | 0.355    | 0.312    | 0.063    | 0.907          | 0.123 | 3.492 |                  |
| 82   | Emb88               | 29            | 0.539 | 0.621 | 0.117  | 0.265    | 0.188    | 0.096    | 0.718          | 0.061 | 2.790 |                  |
| 83   | Emb53 <sup>¶</sup>  | 20            | 0.491 | 0.731 | 0.315  | 0.453    | 0.419    | 0.059    | 0.841          | 0.142 | 3.339 | **               |
| 84   | EUCeSSR0226         | 5             | 0.359 | 0.410 | 0.098  | 0.202    | 0.179    | 0.028    | 0.454          | 0.040 | 1.945 | **               |
| 85   | EUCeSSR0497         | 6             | 0.988 | 0.684 | -0.461 | -0.313   | -0.400   | 0.063    | 0.703          | 0.000 | 2.749 |                  |

| No.* | SSR locus             | $N_A^\dagger$ | $H_O$   | $H_E$   | $F$     | $F_{IT}$ | $F_{IS}$ | $F_{ST}$            | $PIC^\ddagger$ | NAF     | $A_R$   | HWE $^\S$ |
|------|-----------------------|---------------|---------|---------|---------|----------|----------|---------------------|----------------|---------|---------|-----------|
| 86   | EUCeSSR0845           | 18            | 0.613   | 0.695   | 0.102   | 0.225    | 0.212    | 0.016               | 0.780          | 0.070   | 2.943   |           |
| 87   | EUCeSSR1125           | 20            | 0.734   | 0.788   | 0.061   | 0.160    | 0.150    | 0.012               | 0.834          | 0.065   | 3.294   | **        |
| 88   | EUCeSSR0592           | 10            | 0.514   | 0.605   | 0.166   | 0.236    | 0.202    | 0.042               | 0.708          | 0.091   | 2.585   |           |
| 89   | EUCeSSR0909           | 28            | 0.692   | 0.776   | 0.103   | 0.213    | 0.201    | 0.015               | 0.836          | 0.067   | 3.329   |           |
| 90   | Embra217              | 20            | 0.667   | 0.803   | 0.174   | 0.281    | 0.233    | 0.062               | 0.907          | 0.091   | 3.516   | **        |
| 91   | EUCeSSR0679           | 15            | 0.278   | 0.580   | 0.452   | 0.615    | 0.577    | 0.089               | 0.743          | 0.216   | 2.782   |           |
| 92   | EUCeSSR596            | 18            | 0.677   | 0.818   | 0.174   | 0.247    | 0.226    | 0.027               | 0.885          | 0.097   | 3.424   |           |
| 93   | Embra40               | 21            | 0.519   | 0.811   | 0.368   | 0.410    | 0.412    | -0.003              | 0.860          | 0.148   | 3.490   | **        |
| 94   | EUCeSSR1044           | 7             | 0.223   | 0.253   | 0.104   | 0.226    | 0.168    | 0.070               | 0.280          | 0.031   | 1.587   |           |
| 95   | EUCeSSR0568           | 20            | 0.443   | 0.772   | 0.434   | 0.465    | 0.464    | 0.001               | 0.835          | 0.193   | 3.183   | **        |
| 96   | EUCeSSR0126           | 11            | 0.409   | 0.657   | 0.389   | 0.445    | 0.426    | 0.033               | 0.759          | 0.136   | 2.818   |           |
| 97   | Embra394 <sup>¶</sup> | 17            | 0.376   | 0.609   | 0.338   | 0.532    | 0.449    | 0.155               | 0.821          | 0.134   | 3.394   | **        |
| 98   | Embra87               | 27            | 0.823   | 0.826   | 0.001   | 0.118    | 0.098    | 0.023               | 0.839          | 0.034   | 3.631   |           |
| 99   | Embra165 <sup>¶</sup> | 22            | 0.793   | 0.870   | 0.090   | 0.152    | 0.142    | 0.012               | 0.927          | 0.043   | 3.623   |           |
| 100  | Embra326              | 17            | 0.802   | 0.732   | -0.104  | -0.016   | -0.037   | 0.020               | 0.781          | 0.014   | 2.984   |           |
| 101  | EUCeSSR1117           | 16            | 0.363   | 0.669   | 0.456   | 0.512    | 0.490    | 0.044               | 0.725          | 0.186   | 2.814   |           |
| 102  | EUCeSSR0893           | 14            | 0.221   | 0.690   | 0.680   | 0.740    | 0.708    | 0.109               | 0.857          | 0.273   | 3.233   | **        |
| 103  | Embra269              | 18            | 0.659   | 0.776   | 0.159   | 0.258    | 0.210    | 0.061               | 0.866          | 0.073   | 3.328   |           |
| 104  | EUCeSSR1021           | 11            | 0.697   | 0.624   | -0.127  | 0.032    | -0.015   | 0.046               | 0.744          | 0.018   | 2.718   |           |
| 105  | EUCeSSR292            | 11            | 0.266   | 0.653   | 0.565   | 0.659    | 0.632    | 0.077               | 0.790          | 0.264   | 3.000   | **        |
| 106  | EUCeSSR349            | 20            | 0.630   | 0.702   | 0.109   | 0.198    | 0.157    | 0.048               | 0.765          | 0.052   | 2.963   | **        |
| 107  | EUCeSSR209            | 6             | 0.549   | 0.557   | 0.030   | 0.167    | 0.065    | 0.109               | 0.664          | 0.049   | 2.487   |           |
| 108  | EUCeSSR0849           | 13            | 0.472   | 0.748   | 0.351   | 0.456    | 0.420    | 0.064               | 0.842          | 0.148   | 3.321   |           |
| 109  | Embra258              | 20            | 0.745   | 0.802   | 0.074   | 0.168    | 0.134    | 0.039               | 0.889          | 0.045   | 3.426   |           |
| 110  | EUCeSSR1145           | 15            | 0.430   | 0.534   | 0.174   | 0.232    | 0.240    | -0.011              | 0.609          | 0.085   | 2.313   |           |
|      | Mean                  | 16.9          | 0.623   | 0.706   | 0.108   | 0.211    | 0.181    | 0.037 <sup>††</sup> | 0.776          | 0.075   | 3.027   |           |
|      | (SE)                  | (8.2)         | (0.006) | (0.004) | (0.008) | (0.022)  | (0.022)  | (0.003)             | (0.150)        | (0.070) | (0.532) |           |



$N_A$ , number of alleles per locus;  $H_O$ , observed heterozygosity;  $H_E$ , expected heterozygosity;  $F$ , fixation index;  $F_{IT}$ , inbreeding coefficients of individuals relative to the total population;  $F_{IS}$ , inbreeding coefficients of individuals relative to the sub-population;  $F_{ST}$ , among-population differentiation;  $N_M$ , number of migrants; PIC, polymorphic information content; NAF, null allele frequency;  $A_R$ , allelic richness; HWE, Hardy-Weinberg equilibrium.

\* Serial number of each SSR locus is the same as that in Supplementary Table S1.

† The total number of alleles for all the 110 loci is 1,857.

‡ There were 103 (93.6 %) highly polymorphic loci according to the criterion of  $PIC \geq 0.50$  (Botsterin *et al.*, 1980), except the seven (6.4 %) loci EUCeSSR0930, EUCeSSR0705, EUCeSSR231, EUCeSSR0959, EUCeSSR0776, EUCeSSR0226 and EUCeSSR1044.

§ Significant departure from HWE (12 gSSRs and 16 EST-SSRs) over all populations: \*\*  $P < 0.01$ . The 12 non-HWE gSSRs (Embra100, Embra98, Embra115, Embra280, Embra377, Embra242, Embra304, Embra187, Embra53, Embra217, Embra40 and Embra394) were excluded from population diversity and structure analyses.

¶ Eight gSSR loci (Embra98, Embra115, Embra280, Embra242, Embra197, Embra53, Embra394 and Embra165; Supplementary Fig. S1) exhibiting  $F_{ST}$  outlying values for the 16 populations were excluded from population diversity and structure analyses.

†† The overall mean of  $F_{ST}$  for the 31 putatively neutral gSSRs (see Results) is 0.039, which is consistent with between-population comparisons (mean  $F_{ST} = 0.037$ ; Supplementary Table S3) and analysis of molecular variance (AMOVA; among-population variation percentage being 3.7%,  $P < 0.001$ ; Supplementary Table S4).

**Supplementary Table S3. Between-population  $F_{ST}$  values for 16 *E. grandis* populations based on 31 putatively neutral gSSR loci**

| Pop. code* | Pic          | Cop          | MS           | Fin          | Cre          | Kin                 | Bel                 | Bor   | Con                 | Kil                 | MM    | MT                  | ML    | Bag                 | Ora   |
|------------|--------------|--------------|--------------|--------------|--------------|---------------------|---------------------|-------|---------------------|---------------------|-------|---------------------|-------|---------------------|-------|
| Cop        | 0.033        |              |              |              |              |                     |                     |       |                     |                     |       |                     |       |                     |       |
| MS         | 0.046        | 0.061        |              |              |              |                     |                     |       |                     |                     |       |                     |       |                     |       |
| Fin        | 0.083        | 0.081        | 0.088        |              |              |                     |                     |       |                     |                     |       |                     |       |                     |       |
| Cre        | 0.059        | 0.059        | 0.074        | 0.035        |              |                     |                     |       |                     |                     |       |                     |       |                     |       |
| Kin        | <b>0.044</b> | <b>0.045</b> | <b>0.073</b> | <b>0.076</b> | <b>0.057</b> |                     |                     |       |                     |                     |       |                     |       |                     |       |
| Bel        | <b>0.025</b> | <b>0.031</b> | <b>0.043</b> | <b>0.076</b> | <b>0.050</b> | 0.012               |                     |       |                     |                     |       |                     |       |                     |       |
| Bor        | <b>0.033</b> | <b>0.049</b> | <b>0.068</b> | <b>0.088</b> | <b>0.068</b> | 0.004 <sup>NS</sup> | 0.011               |       |                     |                     |       |                     |       |                     |       |
| Con        | <b>0.029</b> | <b>0.040</b> | <b>0.041</b> | <b>0.063</b> | <b>0.046</b> | 0.019               | 0.003 <sup>NS</sup> | 0.013 |                     |                     |       |                     |       |                     |       |
| Kil        | <b>0.013</b> | <b>0.037</b> | <b>0.041</b> | <b>0.075</b> | <b>0.060</b> | 0.023               | 0.000 <sup>NS</sup> | 0.010 | 0.000 <sup>NS</sup> |                     |       |                     |       |                     |       |
| MM         | <b>0.039</b> | <b>0.057</b> | <b>0.055</b> | <b>0.082</b> | <b>0.063</b> | 0.008 <sup>NS</sup> | 0.018               | 0.013 | 0.011               | 0.014               |       |                     |       |                     |       |
| MT         | <b>0.028</b> | <b>0.039</b> | <b>0.057</b> | <b>0.063</b> | <b>0.050</b> | 0.012               | 0.004 <sup>NS</sup> | 0.015 | 0.004 <sup>NS</sup> | 0.006 <sup>NS</sup> | 0.014 |                     |       |                     |       |
| ML         | <b>0.040</b> | <b>0.037</b> | <b>0.063</b> | <b>0.063</b> | <b>0.048</b> | 0.034               | 0.020               | 0.034 | 0.020               | 0.016               | 0.023 | 0.020               |       |                     |       |
| Bag        | <b>0.033</b> | <b>0.044</b> | <b>0.065</b> | <b>0.080</b> | <b>0.059</b> | 0.028               | 0.008 <sup>NS</sup> | 0.017 | 0.019               | 0.015               | 0.027 | 0.010               | 0.031 |                     |       |
| Ora        | <b>0.039</b> | <b>0.042</b> | <b>0.054</b> | <b>0.069</b> | <b>0.046</b> | 0.022               | 0.000 <sup>NS</sup> | 0.020 | 0.000 <sup>NS</sup> | 0.004 <sup>NS</sup> | 0.021 | 0.004 <sup>NS</sup> | 0.026 | 0.000 <sup>NS</sup> |       |
| Bul        | <b>0.051</b> | <b>0.072</b> | <b>0.077</b> | <b>0.107</b> | <b>0.087</b> | 0.024               | 0.027               | 0.027 | 0.011 <sup>NS</sup> | 0.021               | 0.031 | 0.023               | 0.057 | 0.026               | 0.018 |

NS, not significant from zero at  $P < 0.05$ . All  $F_{ST}$  values are significant from zero ( $P < 0.05$ ) unless indicated (NS). The overall mean of  $F_{ST}$  is 0.037. The bold values are  $F_{ST}$  between the northern (codes Pic, Cop, MS, Fin and Cre) and southern (the rest codes) populations (mean  $F_{ST} = 0.054$ ), while the above are between the northern populations (mean  $F_{ST} = 0.062$ ) and the right are between the southern populations (mean  $F_{ST} = 0.016$ ).

\* See Table 1 for full description of the populations.

**Supplementary Table S4. Analysis of molecular variance (AMOVA) among and within *E. grandis* populations based on 31 neutral gSSR loci**

| Source                               | d.f.  | SS       | MS    | Variance component | Percentage of variation |
|--------------------------------------|-------|----------|-------|--------------------|-------------------------|
| Among populations                    | 15    | 379.02   | 25.27 | 0.49               | 3.7%                    |
| Among individuals within populations | 143   | 2210.27  | 15.46 | 2.60               | 19.4%                   |
| Within individuals                   | 159   | 1632.50  | 10.27 | 10.27              | 76.9%                   |
| Total                                | 317   | 4221.79  |       | 13.36              | 100.0%                  |
| <i>F</i> -Statistics                 | Value | <i>P</i> |       |                    |                         |
| $F_{ST}$                             | 0.037 | < 0.001  |       |                    |                         |
| $F_{IS}$                             | 0.202 | < 0.001  |       |                    |                         |
| $F_{IT}$                             | 0.231 | < 0.001  |       |                    |                         |

d.f., degree of freedom; SS, sum of squares; MS, mean square;  $F_{ST}$ , among-population differentiation;  $F_{IS}$ , inbreeding coefficients of individuals relative to the sub-population;  $F_{IT}$ , inbreeding coefficients of individuals relative to the total population.

## References

- Acuña, C. V. *et al.* Discovery, validation, and *in silico* functional characterization of EST-SSR markers in *Eucalyptus globulus*. *Tree Genet. Genomes* **8**, 289–301 (2012).
- Botstein, D., White, R. L., Skolnick, M. & Davis, R. W. Construction of genetic linkage map in man using restriction fragment length polymorphisms. *Am. J. Human Genet.* **32**, 314–331 (1980).
- Brondani, R. P. V., Williams, E. R., Brondani, C. & Grattapaglia, D. A microsatellite-based consensus linkage map for species of *Eucalyptus* and a novel set of 230 microsatellite markers for the genus. *BMC Plant Biology* **6**, 20 (2006).
- Faria, D. A., Mamani, E. M. C., Pappas, G. J. & Grattapaglia, D. Genotyping systems for *Eucalyptus* based on tetra-, penta-, and hexanucleotide repeat EST microsatellites and their use for individual fingerprinting and assignment tests. *Tree Genet. Genomes* **7**, 63–77 (2011).
- He, X., Li, F., Shi, J. & Gan, S. Seven genomic SSR markers revealed in *Eucalyptus* by re-sequencing of DNA sequences from GenBank. *Silvae Genet.* **60**, 92–94 (2011).
- He, X. *et al.* Development of 198 novel EST-derived microsatellites in *Eucalyptus* (Myrtaceae). *Am. J. Bot.* **99**, e134–e148 (2012).
- Zhou, C. *et al.* Comparison between direct sequencing and pool-cloning-based sequencing of PCR products in EST-SSR marker development in *Eucalyptus*. *Mol. Plant Breed.* **8**, e1 (2010).
- Zhou, C. *et al.* Development of 240 novel EST-SSRs in *Eucalyptus* L'Hérit. *Mol. Breed.* **33**, 221–225 (2014).
